# Supplementary material for: Endothelial junctional membrane protrusions serve as hotspots for neutrophil transmigration
Source: eLife journal article supplement (doi:10.7554/elife.66074), 2021-08-25
Supplement: fig4-data1 [file elife-66074-fig4-data1-v2.pdf]

## Data source: Western blotting

Figure 4  
Supplemental Figure 4B

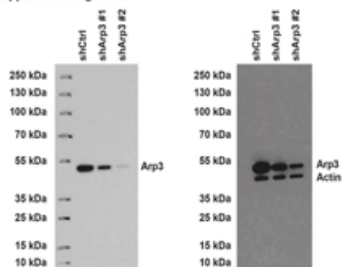

Supplemental Figure 4E

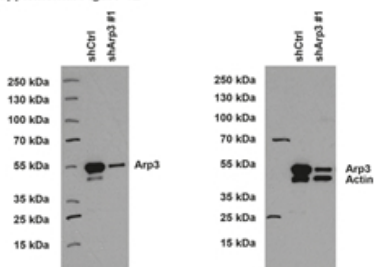

Source Data Western blotting Arts et al. **Figure 4 Supplemental figure 4B**: HUVEC samples were analysed for Arp 3 knock down. Samples were lysed and treated as described in Methods. Western blots were stained for Arp3 primary antibodies and secondary HRP labeled antibodies for chemiluminescence. Full blots are displayed.
